# Supplementary material
Source: MDPI journal article supplement (https://www.mdpi.com/1424-2818/15/10/1040)
Supplement: s1 [file s1]

**Table S5:** Uncorrected p-distances, Tamura—Nei genetic distances within the studied Cheliferidae pseudoscorpions. DL: Delimited lineage, H: number of haplotypes within the lineage, S.E.: standard error.

| Species                             | DL | H  | p-distance [S.E.] | Tamura - Nei [S.E.] |
|-------------------------------------|----|----|-------------------|---------------------|
| <i>Chelifer cancroides</i>          | A  | 2  | 0.02 [0.01]       | 0.02 [0.01]         |
| <i>Chelifer cancroides</i>          | B  | 3  | 0.04 [0.01]       | 0.05 [0.01]         |
| <i>Chelifer cancroides</i>          | C  | 16 | 0.01 [0.00]       | 0.01 [0.00]         |
| <i>Dactylochelifer sp.</i>          | A  | 1  | N/A [N/A]         | N/A [N/A]           |
| <i>Dactylochelifer sp.</i>          | B  | 5  | 0.02 [0.00]       | 0.02 [0.00]         |
| <i>Dactylochelifer sp.</i>          | C  | 1  | N/A [N/A]         | N/A [N/A]           |
| <i>Dactylochelifer copiosus</i>     | D  | 2  | 0.01 [0.00]       | 0.01 [0.00]         |
| <i>Dactylochelifer sp.</i>          | E  | 4  | 0.03 [0.00]       | 0.04 [0.01]         |
| <i>Dactylochelifer latreillii</i>   | F  | 10 | 0.01 [0.00]       | 0.01 [0.00]         |
| <i>Dactylochelifer latreillii</i>   | G  | 7  | 0.01 [0.00]       | 0.01 [0.00]         |
| <i>Dactylochelifer latreillii</i>   | H  | 11 | 0.01 [0.00]       | 0.02 [0.00]         |
| <i>Rhacochelifer sp.</i>            | A  | 1  | N/A [N/A]         | N/A [N/A]           |
| <i>Rhacochelifer sp.</i>            | B  | 2  | 0.01 [0.00]       | 0.01 [0.00]         |
| <i>Rhacochelifer sp.</i>            | C  | 2  | 0.02 [0.01]       | 0.02 [0.01]         |
| <i>Rhacochelifer sp.</i>            | D  | 21 | 0.03 [0.00]       | 0.03 [0.00]         |
| <i>Hysterochelifer meridianus</i>   | A  | 26 | 0.03 [0.00]       | 0.03 [0.00]         |
| <i>Hysterochelifer tuberculatus</i> | B  | 7  | 0.02 [0.00]       | 0.02 [0.00]         |
| <i>Hysterochelifer tuberculatus</i> | C  | 2  | 0.00 [0.00]       | 0.00 [0.00]         |
| <i>Hysterochelifer tuberculatus</i> | D  | 2  | 0.03 [0.01]       | 0.03 [0.01]         |
| <i>Hysterochelifer tuberculatus</i> | E  | 4  | 0.01 [0.00]       | 0.01 [0.00]         |
| <i>Hysterochelifer tuberculatus</i> | F  | 8  | 0.01 [0.00]       | 0.01 [0.00]         |
| <i>Hysterochelifer tuberculatus</i> | G  | 2  | 0.01 [0.00]       | 0.01 [0.00]         |
| <i>Hysterochelifer tuberculatus</i> | H  | 3  | 0.01 [0.00]       | 0.01 [0.00]         |
| <i>Hysterochelifer tuberculatus</i> | I  | 7  | 0.01 [0.00]       | 0.01 [0.00]         |
