# Supplementary material
Source: MDPI journal article supplement (https://www.mdpi.com/1424-2818/15/10/1040)
Supplement: s1 [file s1]

**Table S4:** Uncorrected p-distances, Tamura—Nei genetic distances among the studied Cheliferidae lineages. Upper values: p-distances, lower values: Tamura-Nei, L: Lineage. Numbers in brackets represent the standard error.

| PD<br>TN                                | L | <i>Chelifer<br/>cancroides</i><br>A | <i>Chelifer<br/>cancroides</i><br>B | <i>Chelifer<br/>cancroides</i><br>C | <i>Hysterochelifer<br/>meridianus</i><br>A | <i>Hysterochelifer<br/>tuberculatus</i><br>B | <i>Hysterochelifer<br/>tuberculatus</i><br>C | <i>Hysterochelifer<br/>tuberculatus</i><br>D | <i>Hysterochelifer<br/>tuberculatus</i><br>E | <i>Hysterochelifer<br/>tuberculatus</i><br>F | <i>Hysterochelifer<br/>tuberculatus</i><br>G | <i>Hysterochelifer<br/>tuberculatus</i><br>H | <i>Hysterochelifer<br/>tuberculatus</i><br>I |
|-----------------------------------------|---|-------------------------------------|-------------------------------------|-------------------------------------|--------------------------------------------|----------------------------------------------|----------------------------------------------|----------------------------------------------|----------------------------------------------|----------------------------------------------|----------------------------------------------|----------------------------------------------|----------------------------------------------|
| <i>Chelifer<br/>cancroides</i>          | A |                                     |                                     |                                     |                                            |                                              |                                              |                                              |                                              |                                              |                                              |                                              |                                              |
| <i>Chelifer<br/>cancroides</i>          | B | 0.11 [0.01]<br>0.13 [0.02]          |                                     |                                     |                                            |                                              |                                              |                                              |                                              |                                              |                                              |                                              |                                              |
| <i>Chelifer<br/>cancroides</i>          | C | 0.12 [0.01]<br>0.15 [0.02]          | 0.10 [0.01]<br>0.11 [0.01]          |                                     |                                            |                                              |                                              |                                              |                                              |                                              |                                              |                                              |                                              |
| <i>Hysterochelifer<br/>meridianus</i>   | A |                                     |                                     |                                     |                                            |                                              |                                              |                                              |                                              |                                              |                                              |                                              |                                              |
| <i>Hysterochelifer<br/>tuberculatus</i> | B |                                     |                                     |                                     |                                            | 0.13 [0.01]<br>0.16 [0.02]                   |                                              |                                              |                                              |                                              |                                              |                                              |                                              |
| <i>Hysterochelifer<br/>tuberculatus</i> | C |                                     |                                     |                                     |                                            | 0.15 [0.01]<br>0.19 [0.02]                   | 0.11 [0.01]<br>0.14 [0.02]                   |                                              |                                              |                                              |                                              |                                              |                                              |
| <i>Hysterochelifer<br/>tuberculatus</i> | D |                                     |                                     |                                     |                                            | 0.13 [0.01]<br>0.17 [0.02]                   | 0.13 [0.01]<br>0.17 [0.02]                   | 0.13 [0.01]<br>0.17 [0.02]                   |                                              |                                              |                                              |                                              |                                              |
| <i>Hysterochelifer<br/>tuberculatus</i> | E |                                     |                                     |                                     |                                            | 0.14 [0.01]<br>0.18 [0.02]                   | 0.11 [0.01]<br>0.14 [0.02]                   | 0.10 [0.01]<br>0.13 [0.02]                   | 0.11 [0.01]<br>0.13 [0.01]                   |                                              |                                              |                                              |                                              |
| <i>Hysterochelifer<br/>tuberculatus</i> | F |                                     |                                     |                                     |                                            | 0.13 [0.01]<br>0.16 [0.02]                   | 0.10 [0.01]<br>0.13 [0.02]                   | 0.12 [0.01]<br>0.14 [0.02]                   | 0.12 [0.01]<br>0.15 [0.02]                   | 0.10 [0.01]<br>0.12 [0.02]                   |                                              |                                              |                                              |
| <i>Hysterochelifer<br/>tuberculatus</i> | G |                                     |                                     |                                     |                                            | 0.14 [0.01]<br>0.18 [0.02]                   | 0.11 [0.01]<br>0.13 [0.02]                   | 0.11 [0.01]<br>0.14 [0.02]                   | 0.14 [0.01]<br>0.17 [0.02]                   | 0.10 [0.01]<br>0.12 [0.02]                   | 0.10 [0.01]<br>0.13 [0.02]                   |                                              |                                              |
| <i>Hysterochelifer<br/>tuberculatus</i> | H |                                     |                                     |                                     |                                            | 0.13 [0.01]<br>0.16 [0.02]                   | 0.10 [0.01]<br>0.12 [0.02]                   | 0.11 [0.01]<br>0.14 [0.02]                   | 0.12 [0.01]<br>0.15 [0.02]                   | 0.10 [0.01]<br>0.12 [0.02]                   | 0.10 [0.01]<br>0.12 [0.02]                   | 0.09 [0.01]<br>0.11 [0.02]                   |                                              |
| <i>Hysterochelifer<br/>tuberculatus</i> | I |                                     |                                     |                                     |                                            | 0.13 [0.01]<br>0.16 [0.02]                   | 0.13 [0.01]<br>0.12 [0.02]                   | 0.11 [0.01]<br>0.14 [0.02]                   | 0.13 [0.01]<br>0.17 [0.02]                   | 0.11 [0.01]<br>0.13 [0.02]                   | 0.10 [0.01]<br>0.13 [0.02]                   | 0.10 [0.01]<br>0.12 [0.01]                   | 0.08 [0.01]<br>0.10 [0.02]                   |
| PD<br>TN                                | L | <i>Rhacochelifer</i><br>sp.<br>A    | <i>Rhacochelifer</i><br>sp.<br>B    | <i>Rhacochelifer</i><br>sp.<br>C    | <i>Rhacochelifer</i><br>maculatus<br>D     | <i>Dactylochelifer</i><br>sp.<br>A           | <i>Dactylochelifer</i><br>sp.<br>B           | <i>Dactylochelifer</i><br>sp.<br>C           | <i>Dactylochelifer</i><br>copiosus<br>D      | <i>Dactylochelifer</i><br>sp.<br>E           | <i>Dactylochelifer</i><br>latreillii<br>F    | <i>Dactylochelifer</i><br>latreillii<br>G    | <i>Dactylochelifer</i><br>latreillii<br>H    |
| <i>Rhacochelifer</i><br>sp.             | A |                                     |                                     |                                     |                                            |                                              |                                              |                                              |                                              |                                              |                                              |                                              |                                              |
| <i>Rhacochelifer</i><br>sp.             | B | 0.19 [0.01]<br>0.28 [0.03]          |                                     |                                     |                                            |                                              |                                              |                                              |                                              |                                              |                                              |                                              |                                              |
| <i>Rhacochelifer</i><br>sp.             | C | 0.16 [0.01]<br>0.22 [0.02]          | 0.19 [0.01]<br>0.28 [0.03]          |                                     |                                            |                                              |                                              |                                              |                                              |                                              |                                              |                                              |                                              |
| <i>Rhacochelifer</i><br>maculatus       | D | 0.16 [0.01]<br>0.20 [0.02]          | 0.20 [0.01]<br>0.28 [0.03]          | 0.11 [0.01]<br>0.14 [0.01]          |                                            |                                              |                                              |                                              |                                              |                                              |                                              |                                              |                                              |
| <i>Dactylochelifer</i><br>sp.           | A |                                     |                                     |                                     |                                            |                                              |                                              |                                              |                                              |                                              |                                              |                                              |                                              |
| <i>Dactylochelifer</i><br>sp.           | B |                                     |                                     |                                     |                                            | 0.14 [0.01]<br>0.19 [0.02]                   |                                              |                                              |                                              |                                              |                                              |                                              |                                              |
| <i>Dactylochelifer</i><br>sp.           | C |                                     |                                     |                                     |                                            | 0.16 [0.01]<br>0.22 [0.03]                   | 0.14 [0.01]<br>0.18 [0.02]                   |                                              |                                              |                                              |                                              |                                              |                                              |
| <i>Dactylochelifer</i><br>copiosus      | D |                                     |                                     |                                     |                                            | 0.19 [0.02]<br>0.27 [0.03]                   | 0.18 [0.01]<br>0.25 [0.03]                   | 0.15 [0.01]<br>0.20 [0.02]                   |                                              |                                              |                                              |                                              |                                              |
| <i>Dactylochelifer</i><br>sp.           | E |                                     |                                     |                                     |                                            | 0.16 [0.01]<br>0.21 [0.03]                   | 0.13 [0.01]<br>0.17 [0.02]                   | 0.11 [0.01]<br>0.15 [0.02]                   | 0.16 [0.01]<br>0.21 [0.02]                   |                                              |                                              |                                              |                                              |
| <i>Dactylochelifer</i><br>latreillii    | F |                                     |                                     |                                     |                                            | 0.17 [0.02]<br>0.23 [0.03]                   | 0.15 [0.01]<br>0.20 [0.02]                   | 0.16 [0.02]<br>0.22 [0.02]                   | 0.20 [0.02]<br>0.29 [0.03]                   | 0.16 [0.01]<br>0.22 [0.02]                   |                                              |                                              |                                              |
| <i>Dactylochelifer</i><br>latreillii    | G |                                     |                                     |                                     |                                            | 0.14 [0.01]<br>0.18 [0.02]                   | 0.14 [0.01]<br>0.18 [0.02]                   | 0.14 [0.01]<br>0.18 [0.02]                   | 0.18 [0.01]<br>0.24 [0.03]                   | 0.16 [0.01]<br>0.21 [0.02]                   | 0.12 [0.01]<br>0.15 [0.02]                   |                                              |                                              |
| <i>Dactylochelifer</i><br>latreillii    | H |                                     |                                     |                                     |                                            | 0.16 [0.01]<br>0.22 [0.03]                   | 0.13 [0.01]<br>0.17 [0.02]                   | 0.14 [0.01]<br>0.20 [0.02]                   | 0.18 [0.01]<br>0.26 [0.03]                   | 0.14 [0.01]<br>0.19 [0.02]                   | 0.12 [0.01]<br>0.15 [0.02]                   | 0.09 [0.01]<br>0.11 [0.02]                   |                                              |
